# Supplementary material for: Seven-month-old infants detect symmetrical structures in multi-featured abstract visual patterns
Source: PLoS One. 2022 May 11;17(5):e0266938. doi: 10.1371/journal.pone.0266938 (PMC9094521; doi:10.1371/journal.pone.0266938)
Supplement: S1 File — (XLSX) [file pone.0266938.s001.xlsx]

## Sheet: Group1 Token-ABA
Participant	Test trial	Stimulus type	Total looking time (msec)	Number of unique tiles	Trials excluded from analysis		Number of trials run	Number of trials excluded from analysis	% of trials excluded from analysis
1	1	symmetrical	18960	2			400	5	1.25
1	2	symmetrical	10520	2
1	3	asymmetrical	8280	2
1	4	asymmetrical	6120	2
1	5	symmetrical	7440	2
1	6	asymmetrical	3840	2
1	7	symmetrical	4800	2
1	8	asymmetrical	5120	2
1	9	asymmetrical	6720	2
1	10	symmetrical	18640	2
1	11	asymmetrical	28120	2
1	12	asymmetrical	6960	2
1	13	symmetrical	28840	2
1	14	symmetrical	3200	2
1	15	asymmetrical	5840	2
1	16	symmetrical	5720	2
2	1	asymmetrical	12120	2
2	2	symmetrical	2520	2
2	3	asymmetrical	9160	2
2	4	symmetrical	1760	2
2	5	asymmetrical	5440	2
2	6	symmetrical	3840	2
2	7	symmetrical	1920	2
2	8	asymmetrical	4240	2
2	9	symmetrical	960	2	<1000 ms
2	10	asymmetrical	2360	2
2	11	asymmetrical	2480	2
2	12	symmetrical	2760	2
2	13	asymmetrical	3560	2
2	14	asymmetrical	3320	2
2	15	symmetrical	1960	2
2	16	symmetrical	1480	2
3	1	asymmetrical	17400	2
3	2	symmetrical	7320	2
3	3	symmetrical	4440	2
3	4	asymmetrical	5120	2
3	5	symmetrical	16080	2
3	6	asymmetrical	19800	2
3	7	asymmetrical	4480	2
3	8	symmetrical	8320	2
3	9	asymmetrical	26920	2
3	10	symmetrical	14600	2
3	11	asymmetrical	7080	2
3	12	asymmetrical	3560	2
3	13	symmetrical	3440	2
3	14	symmetrical	3360	2
3	15	asymmetrical	3000	2
3	16	symmetrical	2520	2
4	1	symmetrical	5680	2
4	2	asymmetrical	4640	2
4	3	symmetrical	5240	2
4	4	asymmetrical	2160	2
4	5	asymmetrical	2800	2
4	6	symmetrical	2960	2
4	7	asymmetrical	5920	2
4	8	symmetrical	6800	2
4	9	asymmetrical	13480	2
4	10	symmetrical	3600	2
4	11	symmetrical	5840	2
4	12	asymmetrical	3520	2
4	13	symmetrical	10840	2
4	14	asymmetrical	8400	2
4	15	asymmetrical	2000	2
4	16	symmetrical	4240	2
5	1	asymmetrical	7760	2
5	2	asymmetrical	9880	2
5	3	symmetrical		2	experimenter error during online coding
5	4	symmetrical	8120	2
5	5	asymmetrical	4720	2
5	6	asymmetrical	3960	2
5	7	symmetrical	4520	2
5	8	symmetrical	6280	2
5	9	asymmetrical	5160	2
5	10	symmetrical	2720	2
5	11	asymmetrical	3760	2
5	12	symmetrical	6760	2
5	13	asymmetrical	15760	2
5	14	asymmetrical	8360	2
5	15	symmetrical	4720	2
5	16	symmetrical	12320	2
6	1	symmetrical	22560	2
6	2	asymmetrical	11200	2
6	3	symmetrical	29920	2
6	4	symmetrical	25120	2
6	5	asymmetrical	17440	2
6	6	symmetrical	4320	2
6	7	asymmetrical	9520	2
6	8	asymmetrical	7560	2
6	9	symmetrical	4560	2
6	10	asymmetrical	3080	2
6	11	asymmetrical	20160	2
6	12	symmetrical	23160	2
6	13	asymmetrical	20800	2
6	14	symmetrical	14120	2
6	15	symmetrical	12880	2
6	16	asymmetrical	5400	2
7	1	asymmetrical	1240	2
7	2	symmetrical	29880	2
7	3	symmetrical	13000	2
7	4	asymmetrical	8680	2
7	5	asymmetrical	4320	2
7	6	symmetrical	2760	2
7	7	symmetrical	4280	2
7	8	asymmetrical	2000	2
7	9	asymmetrical	3520	2
7	10	symmetrical	3840	2
7	11	symmetrical	4280	2
7	12	asymmetrical	1200	2
7	13	symmetrical	2120	2
7	14	symmetrical	4120	2
7	15	asymmetrical	6280	2
7	16	asymmetrical	6920	2
8	1	symmetrical	14640	2
8	2	asymmetrical	20400	2
8	3	symmetrical	13080	2
8	4	asymmetrical	7520	2
8	5	asymmetrical	10200	2
8	6	symmetrical	6800	2
8	7	symmetrical	8040	2
8	8	asymmetrical	20760	2
8	9	symmetrical	5440	2
8	10	asymmetrical	3720	2
8	11	asymmetrical	6920	2
8	12	symmetrical	28360	2
8	13	symmetrical	24600	2
8	14	asymmetrical	8920	2
8	15	asymmetrical	10960	2
8	16	symmetrical	6600	2
9	1	asymmetrical	14400	2
9	2	asymmetrical	7280	2
9	3	symmetrical	4600	2
9	4	asymmetrical	28080	2
9	5	symmetrical	4840	2
9	6	symmetrical	24480	2
9	7	asymmetrical	10840	2
9	8	symmetrical	7400	2
9	9	symmetrical	16720	2
9	10	asymmetrical	23920	2
9	11	symmetrical	11440	2
9	12	asymmetrical	23840	2
9	13	symmetrical	19040	2
9	14	asymmetrical	22640	2
9	15	symmetrical	15200	2
9	16	asymmetrical	8640	2
10	1	symmetrical	14760	2
10	2	asymmetrical	22880	2
10	3	asymmetrical	16720	2
10	4	symmetrical	13920	2
10	5	asymmetrical	7320	2
10	6	symmetrical	4320	2
10	7	asymmetrical	9320	2
10	8	symmetrical	8800	2
10	9	symmetrical	13560	2
10	10	asymmetrical	3200	2
10	11	symmetrical	2320	2
10	12	asymmetrical	1840	2
10	13	symmetrical	1240	2
10	14	asymmetrical	1640	2
10	15	asymmetrical	1160	2
10	16	symmetrical	12240	2
11	1	asymmetrical	23240	2
11	2	asymmetrical	28840	2
11	3	symmetrical	21240	2
11	4	asymmetrical	9000	2
11	5	symmetrical	3600	2
11	6	asymmetrical	7640	2
11	7	symmetrical	5840	2
11	8	symmetrical	3120	2
11	9	asymmetrical	1960	2
11	10	symmetrical	6040	2
11	11	asymmetrical	1920	2
11	12	symmetrical	1400	2
11	13	asymmetrical	5280	2
11	14	symmetrical	1360	2
11	15	asymmetrical	6640	2
11	16	symmetrical	3840	2
12	1	symmetrical	26640	2
12	2	symmetrical	5640	2
12	3	asymmetrical	5520	2
12	4	asymmetrical	22360	2
12	5	symmetrical	3480	2
12	6	asymmetrical	19000	2
12	7	symmetrical	21360	2
12	8	asymmetrical	5880	2
12	9	asymmetrical	7240	2
12	10	symmetrical	8480	2
12	11	symmetrical	6040	2
12	12	asymmetrical	17840	2
12	13	symmetrical	2960	2
12	14	symmetrical	5080	2
12	15	asymmetrical	1720	2
12	16	asymmetrical	3400	2
13	1	asymmetrical	8880	2
13	2	symmetrical	21440	2
13	3	asymmetrical		2	parental interference
13	4	asymmetrical	13200	2
13	5	asymmetrical	26600	2
13	6	symmetrical	8240	2
13	7	asymmetrical	5000	2
13	8	symmetrical	5800	2
13	9	symmetrical	7480	2
13	10	asymmetrical	10840	2
13	11	symmetrical	13440	2
13	12	asymmetrical	4440	2
13	13	asymmetrical	3360	2
13	14	symmetrical	2560	2
13	15	asymmetrical	21520	2
13	16	symmetrical	9840	2
14	1	symmetrical	15400	2
14	2	asymmetrical	9520	2
14	3	asymmetrical	8760	2
14	4	symmetrical	24880	2
14	5	symmetrical	15480	2
14	6	asymmetrical	22600	2
14	7	symmetrical	6640	2
14	8	asymmetrical	10200	2
14	9	asymmetrical	4200	2
14	10	symmetrical	10520	2
14	11	symmetrical	3480	2
14	12	asymmetrical	2600	2
14	13	asymmetrical	3000	2
14	14	symmetrical	3560	2
14	15	symmetrical	9800	2
14	16	asymmetrical	4360	2
15	1	asymmetrical	23560	2
15	2	asymmetrical	6680	2
15	3	symmetrical	10040	2
15	4	asymmetrical	4480	2
15	5	symmetrical	3600	2
15	6	symmetrical	13160	2
15	7	asymmetrical	5000	2
15	8	symmetrical	11200	2
15	9	symmetrical	9280	2
15	10	asymmetrical	10560	2
15	11	asymmetrical	6960	2
15	12	symmetrical	5400	2
15	13	asymmetrical	2760	2
15	14	symmetrical	10640	2
15	15	symmetrical	1600	2
15	16	asymmetrical	2120	2
16	1	symmetrical	23280	2
16	2	asymmetrical	11400	2
16	3	asymmetrical	5640	2
16	4	symmetrical	18760	2
16	5	asymmetrical	5480	2
16	6	asymmetrical	4920	2
16	7	symmetrical	6040	2
16	8	symmetrical	10960	2
16	9	asymmetrical	9360	2
16	10	symmetrical	5880	2
16	11	asymmetrical	3840	2
16	12	asymmetrical	1600	2
16	13	symmetrical	2240	2
16	14	symmetrical	1640	2
16	15	asymmetrical	1200	2
16	16	symmetrical	920	2	<1000 ms
17	1	asymmetrical	6760	2
17	2	asymmetrical	6520	2
17	3	symmetrical	5600	2
17	4	asymmetrical	12120	2
17	5	symmetrical	26800	2
17	6	asymmetrical	14520	2
17	7	symmetrical	4120	2
17	8	symmetrical	19400	2
17	9	asymmetrical	3000	2
17	10	symmetrical	8960	2
17	11	asymmetrical	10920	2
17	12	symmetrical	11200	2
17	13	asymmetrical	7240	2
17	14	asymmetrical	15520	2
17	15	symmetrical	14320	2
17	16	symmetrical	3520	2
18	1	symmetrical	7120	2
18	2	asymmetrical	6600	2
18	3	asymmetrical	7240	2
18	4	symmetrical	4960	2
18	5	asymmetrical	8440	2
18	6	symmetrical	6520	2
18	7	asymmetrical	7880	2
18	8	symmetrical	2680	2
18	9	asymmetrical	2120	2
18	10	asymmetrical	3280	2
18	11	symmetrical	4600	2
18	12	symmetrical	22200	2
18	13	asymmetrical	14720	2
18	14	asymmetrical	5880	2
18	15	symmetrical	5160	2
18	16	symmetrical	4360	2
19	1	asymmetrical	9240	2
19	2	symmetrical	10240	2
19	3	symmetrical	5040	2
19	4	asymmetrical	5480	2
19	5	asymmetrical	3400	2
19	6	symmetrical	2200	2
19	7	asymmetrical	2480	2
19	8	symmetrical	1920	2
19	9	symmetrical	1960	2
19	10	asymmetrical	3440	2
19	11	symmetrical	1680	2
19	12	asymmetrical	2120	2
19	13	symmetrical	1440	2
19	14	asymmetrical	1080	2
19	15	asymmetrical	1560	2
19	16	symmetrical	7040	2
20	1	symmetrical	4680	2
20	2	asymmetrical	26320	2
20	3	symmetrical	25640	2
20	4	asymmetrical	23640	2
20	5	symmetrical	10440	2
20	6	asymmetrical	7960	2
20	7	asymmetrical	11560	2
20	8	symmetrical	6800	2
20	9	asymmetrical	6480	2
20	10	symmetrical	18080	2
20	11	symmetrical	5160	2
20	12	asymmetrical	7800	2
20	13	symmetrical	10320	2
20	14	asymmetrical	3680	2
20	15	symmetrical	9280	2
20	16	asymmetrical	4440	2
21	1	symmetrical	21240	2
21	2	asymmetrical	26920	2
21	3	asymmetrical	17000	2
21	4	symmetrical	8520	2
21	5	symmetrical	5720	2
21	6	asymmetrical	6120	2
21	7	asymmetrical	15640	2
21	8	symmetrical	4240	2
21	9	asymmetrical	3840	2
21	10	symmetrical	4080	2
21	11	asymmetrical	1440	2
21	12	symmetrical	6840	2
21	13	asymmetrical	5960	2
21	14	asymmetrical	6880	2
21	15	symmetrical	1160	2
21	16	symmetrical	20880	2
22	1	asymmetrical	12920	2
22	2	symmetrical	6120	2
22	3	asymmetrical	18080	2
22	4	asymmetrical	4000	2
22	5	symmetrical	8960	2
22	6	asymmetrical	5440	2
22	7	symmetrical	2120	2
22	8	symmetrical	2360	2
22	9	asymmetrical	2240	2
22	10	symmetrical	1640	2
22	11	symmetrical	1320	2
22	12	asymmetrical	4480	2
22	13	asymmetrical	6240	2
22	14	symmetrical	9480	2
22	15	asymmetrical	2400	2
22	16	symmetrical	640	2	<1000 ms
23	1	symmetrical	6200	2
23	2	asymmetrical	5720	2
23	3	asymmetrical	7400	2
23	4	symmetrical	6280	2
23	5	asymmetrical	7440	2
23	6	asymmetrical	5640	2
23	7	symmetrical	22760	2
23	8	symmetrical	13560	2
23	9	asymmetrical	15440	2
23	10	symmetrical	19120	2
23	11	symmetrical	20800	2
23	12	asymmetrical	19040	2
23	13	asymmetrical	8440	2
23	14	symmetrical	4320	2
23	15	symmetrical	18640	2
23	16	asymmetrical	4000	2
24	1	asymmetrical	21280	2
24	2	symmetrical	20760	2
24	3	symmetrical	11560	2
24	4	asymmetrical	6640	2
24	5	symmetrical	6600	2
24	6	asymmetrical	1280	2
24	7	symmetrical	4640	2
24	8	asymmetrical	3440	2
24	9	asymmetrical	3640	2
24	10	symmetrical	4000	2
24	11	symmetrical	2920	2
24	12	asymmetrical	2040	2
24	13	symmetrical	2880	2
24	14	asymmetrical	4920	2
24	15	asymmetrical	2920	2
24	16	symmetrical	1240	2
25	1	asymmetrical	12040	2
25	2	asymmetrical	24920	2
25	3	symmetrical	17520	2
25	4	symmetrical	4280	2
25	5	asymmetrical	10040	2
25	6	symmetrical	6240	2
25	7	asymmetrical	2680	2
25	8	symmetrical	2360	2
25	9	asymmetrical	2360	2
25	10	asymmetrical	1960	2
25	11	symmetrical	2400	2
25	12	asymmetrical	1920	2
25	13	symmetrical	5160	2
25	14	asymmetrical	1200	2
25	15	symmetrical	1440	2
25	16	symmetrical	1400	2

## Sheet: Group2 Token-ABABA
Participant	Test trial	Stimulus type	Total looking time (msec)	Number of unique tiles	Trials excluded from analysis	*Position of repetition		Number of trials run	Number of trials excluded from analysis	% of trials excluded from analysis
1	1	symmetrical	4760	2				384	12	3.125
1	2	symmetrical	27960	2
1	3	asymmetrical	21560	2		at edge
1	4	asymmetrical	7200	2		not at edge
1	5	symmetrical	25240	2				*In the asymmetrical trials entered into analysis,
1	6	asymmetrical	7440	2		not at edge		whether repeated tiles appeared at the mosaics' edge
1	7	symmetrical	7720	2
1	8	asymmetrical	6720	2		at edge
1	9	asymmetrical	3400	2		at edge
1	10	symmetrical	2840	2
1	11	asymmetrical	3120	2		not at edge
1	12	asymmetrical	2240	2		at edge
1	13	symmetrical	1080	2
1	14	symmetrical	1400	2
1	15	asymmetrical	1640	2		not at edge
1	16	symmetrical	800	2	<1000 ms
2	1	asymmetrical	13640	2		at edge
2	2	symmetrical	5040	2
2	3	asymmetrical	2400	2		at edge
2	4	symmetrical	16880	2
2	5	asymmetrical	11840	2		at edge
2	6	symmetrical	5000	2
2	7	symmetrical	2480	2
2	8	asymmetrical	6200	2		not at edge
2	9	symmetrical	2520	2
2	10	asymmetrical	1600	2		not at edge
2	11	asymmetrical	680	2	<1000 ms	not at edge
2	12	symmetrical	1920	2
2	13	asymmetrical	1960	2		at edge
2	14	asymmetrical	1360	2		not at edge
2	15	symmetrical	2400	2
2	16	symmetrical	1480	2
3	1	symmetrical	14320	2
3	2	asymmetrical	17400	2		at edge
3	3	asymmetrical	13760	2		at edge
3	4	symmetrical	3600	2
3	5	symmetrical	14080	2
3	6	asymmetrical	2960	2		not at edge
3	7	symmetrical	1920	2
3	8	asymmetrical	2440	2		at edge
3	9	symmetrical	1840	2
3	10	symmetrical	4320	2
3	11	asymmetrical	3480	2		at edge
3	12	asymmetrical	1840	2		not at edge
3	13	symmetrical	4440	2
3	14	asymmetrical	3160	2		not at edge
3	15	symmetrical	4160	2
3	16	asymmetrical	4640	2		not at edge
4	1	asymmetrical	13880	2		not at edge
4	2	symmetrical	17240	2
4	3	symmetrical	2840	2
4	4	asymmetrical	12240	2		at edge
4	5	symmetrical	10120	2
4	6	asymmetrical	3400	2		not at edge
4	7	asymmetrical	18520	2		at edge
4	8	symmetrical	14440	2
4	9	asymmetrical	1960	2		not at edge
4	10	symmetrical	2280	2
4	11	asymmetrical	1720	2		not at edge
4	12	asymmetrical	4680	2		at edge
4	13	symmetrical	3480	2
4	14	symmetrical	1400	2
4	15	asymmetrical	1360	2		at edge
4	16	symmetrical	1520	2
5	1	symmetrical	25560	2
5	2	asymmetrical	25880	2		not at edge
5	3	symmetrical	19360	2
5	4	asymmetrical	23400	2		not at edge
5	5	asymmetrical	19160	2		at edge
5	6	symmetrical	18000	2
5	7	asymmetrical	5600	2		at edge
5	8	symmetrical	23080	2
5	9	asymmetrical	21040	2		at edge
5	10	symmetrical	6200	2
5	11	symmetrical	4560	2
5	12	asymmetrical	4320	2		not at edge
5	13	symmetrical		2	parental interference
5	14	asymmetrical		2	parental interference
5	15	asymmetrical	2120	2		at edge
5	16	symmetrical	19880	2
6	1	asymmetrical	7760	2		at edge
6	2	asymmetrical	28760	2		at edge
6	3	symmetrical	25440	2
6	4	symmetrical	9040	2
6	5	asymmetrical	18680	2		not at edge
6	6	asymmetrical	25600	2		at edge
6	7	symmetrical	4160	2
6	8	symmetrical	24040	2
6	9	asymmetrical	5760	2		not at edge
6	10	symmetrical	8240	2
6	11	asymmetrical	28440	2		at edge
6	12	symmetrical	11080	2
6	13	asymmetrical	3000	2		not at edge
6	14	asymmetrical	3400	2		not at edge
6	15	symmetrical	2720	2
6	16	symmetrical	1200	2
7	1	symmetrical	23720	2
7	2	asymmetrical	8680	2		not at edge
7	3	symmetrical	4280	2
7	4	symmetrical	3520	2
7	5	asymmetrical	4320	2		not at edge
7	6	symmetrical	2840	2
7	7	asymmetrical	29840	2		at edge
7	8	asymmetrical	26600	2		at edge
7	9	symmetrical	12160	2
7	10	asymmetrical	4640	2		at edge
7	11	asymmetrical	7480	2		not at edge
7	12	symmetrical	3800	2
7	13	asymmetrical	3200	2		not at edge
7	14	symmetrical	4600	2
7	15	symmetrical	3680	2
7	16	asymmetrical	3480	2		at edge
8	1	asymmetrical	6240	2		not at edge
8	2	symmetrical	7320	2
8	3	symmetrical	2600	2
8	4	asymmetrical	4320	2		at edge
8	5	asymmetrical	2480	2		at edge
8	6	symmetrical	10280	2
8	7	symmetrical	3800	2
8	8	asymmetrical	2600	2		not at edge
8	9	asymmetrical	4120	2		at edge
8	10	symmetrical	1280	2
8	11	symmetrical	1840	2
8	12	asymmetrical	1680	2		not at edge
8	13	symmetrical	3520	2
8	14	symmetrical	1480	2
8	15	asymmetrical	4760	2		not at edge
8	16	asymmetrical	2800	2		at edge
9	1	symmetrical	10200	2
9	2	asymmetrical	8200	2		not at edge
9	3	symmetrical	8280	2
9	4	asymmetrical	8720	2		at edge
9	5	asymmetrical	2600	2		at edge
9	6	symmetrical	12680	2
9	7	symmetrical	10200	2
9	8	asymmetrical	6520	2		not at edge
9	9	symmetrical	8440	2
9	10	asymmetrical	9000	2		at edge
9	11	asymmetrical	6360	2		not at edge
9	12	symmetrical	4440	2
9	13	symmetrical	4320	2
9	14	asymmetrical	18800	2		not at edge
9	15	asymmetrical	4440	2		at edge
9	16	symmetrical	6760	2
10	1	asymmetrical	14040	2		at edge
10	2	asymmetrical	22800	2		not at edge
10	3	symmetrical	6200	2
10	4	asymmetrical	11800	2		at edge
10	5	symmetrical	3720	2
10	6	symmetrical	14560	2
10	7	asymmetrical	19120	2		at edge
10	8	symmetrical	7480	2
10	9	symmetrical	7000	2
10	10	asymmetrical	17600	2		not at edge
10	11	symmetrical	4160	2
10	12	asymmetrical	8480	2		not at edge
10	13	symmetrical	5280	2
10	14	asymmetrical	3680	2		not at edge
10	15	symmetrical	3560	2
10	16	asymmetrical	4840	2		at edge
11	1	symmetrical	12200	2
11	2	asymmetrical	4320	2		not at edge
11	3	asymmetrical	10440	2		at edge
11	4	symmetrical	12680	2
11	5	asymmetrical		2	experimenter error during online coding
11	6	symmetrical	8240	2
11	7	asymmetrical	3080	2		at edge
11	8	symmetrical	2320	2
11	9	symmetrical	2040	2
11	10	asymmetrical	5360	2		not at edge
11	11	symmetrical	8800	2
11	12	asymmetrical	13800	2		at edge
11	13	symmetrical	6040	2
11	14	asymmetrical	1600	2		not at edge
11	15	asymmetrical	2040	2		not at edge
11	16	symmetrical	5160	2
12	1	asymmetrical	9120	2		not at edge
12	2	asymmetrical	3640	2		not at edge
12	3	symmetrical	3960	2
12	4	asymmetrical	1840	2		not at edge
12	5	symmetrical	3400	2
12	6	asymmetrical	1360	2		at edge
12	7	symmetrical	1520	2
12	8	symmetrical	3720	2
12	9	asymmetrical	1880	2		at edge
12	10	symmetrical	1880	2
12	11	asymmetrical	1320	2		not at edge
12	12	symmetrical	720	2	<1000 ms
12	13	asymmetrical	920	2	<1000 ms	at edge
12	14	symmetrical	1400	2
12	15	asymmetrical	1600	2		at edge
12	16	symmetrical	2680	2
13	1	symmetrical	17800	2
13	2	symmetrical	5560	2
13	3	asymmetrical	13240	2		not at edge
13	4	asymmetrical	5000	2		not at edge
13	5	symmetrical	7760	2
13	6	asymmetrical	13360	2		at edge
13	7	symmetrical	3680	2
13	8	asymmetrical	1880	2		at edge
13	9	asymmetrical	4720	2		not at edge
13	10	symmetrical	5760	2
13	11	symmetrical	3080	2
13	12	asymmetrical	7320	2		at edge
13	13	symmetrical	3200	2
13	14	symmetrical	3440	2
13	15	asymmetrical	10280	2		not at edge
13	16	asymmetrical	19960	2		at edge
14	1	symmetrical	8600	2
14	2	asymmetrical	10640	2		at edge
14	3	asymmetrical	1560	2		not at edge
14	4	symmetrical	13960	2
14	5	asymmetrical	17840	2		not at edge
14	6	asymmetrical	1840	2		not at edge
14	7	symmetrical	2280	2
14	8	symmetrical	7080	2
14	9	asymmetrical	3600	2		at edge
14	10	symmetrical	9080	2
14	11	asymmetrical	3080	2		not at edge
14	12	asymmetrical	10280	2		at edge
14	13	symmetrical	5200	2
14	14	symmetrical	12240	2
14	15	asymmetrical	2480	2		at edge
14	16	symmetrical	800	2	<1000 ms
15	1	asymmetrical	19240	2		at edge
15	2	symmetrical	21960	2
15	3	symmetrical	5200	2
15	4	asymmetrical	11080	2		at edge
15	5	symmetrical	21760	2
15	6	symmetrical	19320	2
15	7	asymmetrical	7120	2		not at edge
15	8	asymmetrical	4480	2		not at edge
15	9	symmetrical	4600	2
15	10	asymmetrical	8120	2		not at edge
15	11	symmetrical	3120	2
15	12	asymmetrical	7400	2		at edge
15	13	symmetrical	10920	2
15	14	symmetrical	7920	2
15	15	asymmetrical	13120	2		at edge
15	16	asymmetrical	1600	2		not at edge
16	1	asymmetrical	24600	2		not at edge
16	2	asymmetrical	23600	2		not at edge
16	3	symmetrical	9160	2
16	4	asymmetrical	23800	2		at edge
16	5	symmetrical	20680	2
16	6	asymmetrical	6480	2		not at edge
16	7	symmetrical	1960	2
16	8	symmetrical	8760	2
16	9	asymmetrical	4040	2		at edge
16	10	symmetrical	3760	2
16	11	asymmetrical	3160	2		at edge
16	12	symmetrical	3600	2
16	13	asymmetrical	6920	2		at edge
16	14	asymmetrical	13800	2		not at edge
16	15	symmetrical	3280	2
16	16	symmetrical	4520	2
17	1	symmetrical	8240	2
17	2	asymmetrical	27000	2		at edge
17	3	asymmetrical	13680	2		at edge
17	4	symmetrical	15120	2
17	5	asymmetrical	12400	2		not at edge
17	6	symmetrical	11000	2
17	7	asymmetrical	3360	2		not at edge
17	8	symmetrical	6640	2
17	9	asymmetrical	1920	2		not at edge
17	10	asymmetrical	3480	2		not at edge
17	11	symmetrical	2560	2
17	12	symmetrical	2280	2
17	13	asymmetrical	2080	2		at edge
17	14	asymmetrical	1920	2		at edge
17	15	symmetrical	1920	2
17	16	symmetrical	5280	2
18	1	asymmetrical	7680	2		not at edge
18	2	symmetrical	8880	2
18	3	symmetrical	4920	2
18	4	asymmetrical	5280	2		at edge
18	5	asymmetrical	2880	2		at edge
18	6	symmetrical	920	2	<1000 ms
18	7	symmetrical	2480	2
18	8	asymmetrical	2160	2		at edge
18	9	asymmetrical	2080	2		not at edge
18	10	symmetrical	1600	2
18	11	symmetrical	1280	2
18	12	asymmetrical	1320	2		not at edge
18	13	symmetrical	4520	2
18	14	asymmetrical	760	2	<1000 ms	not at edge
18	15	symmetrical	600	2	<1000 ms
18	16	asymmetrical	1360	2		at edge
19	1	asymmetrical	5480	2		at edge
19	2	symmetrical	5360	2
19	3	symmetrical	6400	2
19	4	asymmetrical	4080	2		not at edge
19	5	asymmetrical	9920	2		at edge
19	6	symmetrical	4280	2
19	7	asymmetrical	3600	2		at edge
19	8	symmetrical	2560	2
19	9	symmetrical	2720	2
19	10	asymmetrical	1840	2		not at edge
19	11	symmetrical	10720	2
19	12	asymmetrical	2400	2		at edge
19	13	symmetrical	3480	2
19	14	asymmetrical	3360	2		not at edge
19	15	asymmetrical	7920	2		not at edge
19	16	symmetrical	1800	2
20	1	symmetrical	7760	2
20	2	asymmetrical	16080	2		not at edge
20	3	symmetrical	12280	2
20	4	asymmetrical	29280	2		not at edge
20	5	symmetrical	9720	2
20	6	asymmetrical	16720	2		not at edge
20	7	asymmetrical	9680	2		at edge
20	8	symmetrical	5960	2
20	9	asymmetrical	2360	2		at edge
20	10	symmetrical	5080	2
20	11	symmetrical	8960	2
20	12	asymmetrical	6280	2		not at edge
20	13	symmetrical	4000	2
20	14	asymmetrical	2840	2		at edge
20	15	symmetrical	16280	2
20	16	asymmetrical	11440	2		at edge
21	1	symmetrical	10600	2
21	2	asymmetrical	7520	2		not at edge
21	3	asymmetrical	4760	2		at edge
21	4	symmetrical	1800	2
21	5	symmetrical	3760	2
21	6	asymmetrical	6280	2		at edge
21	7	asymmetrical	13320	2		at edge
21	8	symmetrical	25600	2
21	9	asymmetrical	25800	2		not at edge
21	10	symmetrical	11840	2
21	11	asymmetrical	27920	2		at edge
21	12	symmetrical	27400	2
21	13	asymmetrical	3640	2		not at edge
21	14	asymmetrical	29600	2		not at edge
21	15	symmetrical	4760	2
21	16	symmetrical	27600	2
22	1	asymmetrical	6240	2		not at edge
22	2	asymmetrical	12120	2		not at edge
22	3	symmetrical	8480	2
22	4	asymmetrical	9160	2		at edge
22	5	symmetrical	18920	2
22	6	asymmetrical	3600	2		at edge
22	7	symmetrical	8200	2
22	8	symmetrical	3320	2
22	9	asymmetrical	1720	2		at edge
22	10	asymmetrical	1400	2		not at edge
22	11	symmetrical	2040	2
22	12	symmetrical	2000	2
22	13	asymmetrical	9920	2		at edge
22	14	symmetrical	3520	2
22	15	asymmetrical	2600	2		not at edge
22	16	symmetrical	4480	2
23	1	symmetrical	10920	2
23	2	asymmetrical	7560	2		at edge
23	3	asymmetrical	10200	2		at edge
23	4	symmetrical	5520	2
23	5	asymmetrical	11520	2		not at edge
23	6	asymmetrical	6480	2		at edge
23	7	symmetrical	4800	2
23	8	symmetrical	9080	2
23	9	asymmetrical	29920	2		not at edge
23	10	symmetrical	26600	2
23	11	symmetrical	28400	2
23	12	asymmetrical	24400	2		not at edge
23	13	asymmetrical	3600	2		at edge
23	14	symmetrical	6240	2
23	15	symmetrical	1680	2
23	16	asymmetrical	760	2	<1000 ms	not at edge
24	1	asymmetrical	15160	2		not at edge
24	2	symmetrical	10400	2
24	3	symmetrical	5880	2
24	4	asymmetrical	3040	2		not at edge
24	5	symmetrical	5040	2
24	6	asymmetrical	4800	2		not at edge
24	7	symmetrical	16360	2
24	8	asymmetrical	8200	2		at edge
24	9	asymmetrical	10160	2		not at edge
24	10	symmetrical	11160	2
24	11	symmetrical	8080	2
24	12	asymmetrical	12600	2		at edge
24	13	symmetrical	7520	2
24	14	asymmetrical	6880	2		at edge
24	15	asymmetrical	11000	2		at edge
24	16	symmetrical	9040	2

## Sheet: Group3 Category-ABA
Participant	Test trial	Stimulus type	Total looking time (msec)	Number of unique tiles	Trials excluded from analysis		Number of trials run	Number of trials excluded from analysis	% of trials excluded from analysis
1	1	symmetrical	2880	3			384	5	1.30208
1	2	symmetrical	8120	3
1	3	asymmetrical	6560	3
1	4	asymmetrical	5160	3
1	5	symmetrical	6920	3
1	6	asymmetrical	10280	3
1	7	symmetrical	2480	3
1	8	asymmetrical	2120	3
1	9	asymmetrical	2760	3
1	10	symmetrical	6480	3
1	11	asymmetrical	3200	3
1	12	asymmetrical	3080	3
1	13	symmetrical	2240	3
1	14	symmetrical	8760	3
1	15	asymmetrical	1720	3
1	16	symmetrical	2040	3
2	1	asymmetrical	3960	3
2	2	symmetrical	3520	3
2	3	asymmetrical	1920	3
2	4	symmetrical	1720	3
2	5	asymmetrical	3080	3
2	6	symmetrical	2040	3
2	7	symmetrical	19400	3
2	8	asymmetrical	2320	3
2	9	symmetrical	16920	3
2	10	asymmetrical	4120	3
2	11	asymmetrical	4240	3
2	12	symmetrical	11160	3
2	13	asymmetrical	1440	3
2	14	asymmetrical	10280	3
2	15	symmetrical	4120	3
2	16	symmetrical	7720	3
3	1	symmetrical	3680	3
3	2	asymmetrical	2720	3
3	3	asymmetrical	23598	3
3	4	symmetrical	8680	3
3	5	symmetrical	7120	3
3	6	asymmetrical	4720	3
3	7	symmetrical	3040	3
3	8	asymmetrical	3440	3
3	9	symmetrical	4760	3
3	10	symmetrical	19920	3
3	11	asymmetrical	9920	3
3	12	asymmetrical	7400	3
3	13	symmetrical	880	3	<1000 ms
3	14	asymmetrical	2920	3
3	15	symmetrical	7320	3
3	16	asymmetrical	2720	3
4	1	asymmetrical	21760	3
4	2	symmetrical	26200	3
4	3	symmetrical	20280	3
4	4	asymmetrical	24720	3
4	5	symmetrical	6480	3
4	6	asymmetrical	11520	3
4	7	asymmetrical	7360	3
4	8	symmetrical	2080	3
4	9	asymmetrical	22320	3
4	10	symmetrical	4240	3
4	11	asymmetrical	8680	3
4	12	asymmetrical	6520	3
4	13	symmetrical	3080	3
4	14	symmetrical	2800	3
4	15	asymmetrical	2280	3
4	16	symmetrical	3040	3
5	1	symmetrical	25440	3
5	2	asymmetrical	5720	3
5	3	symmetrical	16440	3
5	4	asymmetrical	28600	3
5	5	asymmetrical	18520	3
5	6	symmetrical	6840	3
5	7	asymmetrical	2360	3
5	8	symmetrical	6320	3
5	9	asymmetrical	25600	3
5	10	symmetrical	3680	3
5	11	symmetrical	2360	3
5	12	asymmetrical	1240	3
5	13	symmetrical	3400	3
5	14	asymmetrical	8160	3
5	15	asymmetrical	3640	3
5	16	symmetrical	4200	3
6	1	asymmetrical	6800	3
6	2	asymmetrical	15480	3
6	3	symmetrical	2960	3
6	4	symmetrical	1320	3
6	5	asymmetrical	6040	3
6	6	asymmetrical	3760	3
6	7	symmetrical	11600	3
6	8	symmetrical	3440	3
6	9	asymmetrical	6160	3
6	10	symmetrical	3040	3
6	11	asymmetrical	1720	3
6	12	symmetrical	4840	3
6	13	asymmetrical	1120	3
6	14	asymmetrical	2200	3
6	15	symmetrical	8320	3
6	16	symmetrical	5360	3
7	1	symmetrical	7440	3
7	2	asymmetrical	6880	3
7	3	symmetrical	8440	3
7	4	symmetrical	4280	3
7	5	asymmetrical	5520	3
7	6	symmetrical	2600	3
7	7	asymmetrical	6240	3
7	8	asymmetrical	2280	3
7	9	symmetrical	2200	3
7	10	asymmetrical	5400	3
7	11	asymmetrical	1440	3
7	12	symmetrical	1520	3
7	13	asymmetrical	4120	3
7	14	symmetrical	2960	3
7	15	symmetrical	1720	3
7	16	asymmetrical	2280	3
8	1	asymmetrical	2360	3
8	2	symmetrical	1720	3
8	3	symmetrical	3160	3
8	4	asymmetrical	4040	3
8	5	asymmetrical	2560	3
8	6	symmetrical	10800	3
8	7	symmetrical	2480	3
8	8	asymmetrical	7840	3
8	9	asymmetrical	1160	3
8	10	symmetrical	1600	3
8	11	symmetrical	1080	3
8	12	asymmetrical	1040	3
8	13	symmetrical	1920	3
8	14	symmetrical	920	3	<1000 ms
8	15	asymmetrical	960	3	<1000 ms
8	16	asymmetrical	2440	3
9	1	asymmetrical	4640	3
9	2	asymmetrical	1680	3
9	3	symmetrical	7560	3
9	4	asymmetrical	14280	3
9	5	symmetrical	15080	3
9	6	symmetrical	8160	3
9	7	asymmetrical	8800	3
9	8	symmetrical	12440	3
9	9	symmetrical	13560	3
9	10	asymmetrical	1880	3
9	11	symmetrical	1960	3
9	12	asymmetrical	3760	3
9	13	symmetrical	5000	3
9	14	asymmetrical	3840	3
9	15	symmetrical	1320	3
9	16	asymmetrical	3320	3
10	1	asymmetrical	6720	3
10	2	asymmetrical	11320	3
10	3	symmetrical	20720	3
10	4	asymmetrical	7960	3
10	5	symmetrical	5760	3
10	6	symmetrical	2360	3
10	7	asymmetrical	3360	3
10	8	symmetrical	2840	3
10	9	symmetrical	1440	3
10	10	asymmetrical	2560	3
10	11	symmetrical	1440	3
10	12	asymmetrical	4680	3
10	13	symmetrical	1320	3
10	14	asymmetrical	1280	3
10	15	symmetrical	1120	3
10	16	asymmetrical	1400	3
11	1	symmetrical	22320	3
11	2	asymmetrical	27800	3
11	3	asymmetrical	11280	3
11	4	symmetrical	26360	3
11	5	asymmetrical	23720	3
11	6	symmetrical	9600	3
11	7	asymmetrical	1280	3
11	8	symmetrical	8200	3
11	9	symmetrical	12360	3
11	10	asymmetrical	1160	3
11	11	symmetrical	19920	3
11	12	asymmetrical	5760	3
11	13	symmetrical	600	3	<1000 ms
11	14	asymmetrical	5360	3
11	15	asymmetrical	1600	3
11	16	symmetrical	1120	3
12	1	asymmetrical	30000	3
12	2	asymmetrical	3640	3
12	3	symmetrical	8560	3
12	4	asymmetrical	1160	3
12	5	symmetrical	14040	3
12	6	asymmetrical	5000	3
12	7	symmetrical	3080	3
12	8	symmetrical	2080	3
12	9	asymmetrical	1120	3
12	10	symmetrical	2880	3
12	11	asymmetrical	1720	3
12	12	symmetrical	29920	3
12	13	asymmetrical	3120	3
12	14	symmetrical	2600	3
12	15	asymmetrical	6360	3
12	16	symmetrical	26240	3
13	1	symmetrical	4240	3
13	2	symmetrical	7000	3
13	3	asymmetrical	4240	3
13	4	asymmetrical	1440	3
13	5	symmetrical	4000	3
13	6	asymmetrical	7640	3
13	7	symmetrical	4400	3
13	8	asymmetrical	4840	3
13	9	asymmetrical	4360	3
13	10	symmetrical	3000	3
13	11	symmetrical	12240	3
13	12	asymmetrical	6280	3
13	13	symmetrical	29920	3
13	14	symmetrical	3600	3
13	15	asymmetrical	2160	3
13	16	asymmetrical	2440	3
14	1	asymmetrical	11280	3
14	2	symmetrical	18240	3
14	3	symmetrical	8760	3
14	4	asymmetrical	6880	3
14	5	asymmetrical	14560	3
14	6	symmetrical	10920	3
14	7	asymmetrical	8560	3
14	8	symmetrical	7720	3
14	9	symmetrical	19520	3
14	10	asymmetrical	9760	3
14	11	symmetrical	4240	3
14	12	asymmetrical	23120	3
14	13	asymmetrical	9560	3
14	14	symmetrical	3480	3
14	15	asymmetrical	4200	3
14	16	symmetrical	4880	3
15	1	symmetrical	11200	3
15	2	asymmetrical	5360	3
15	3	asymmetrical	20040	3
15	4	symmetrical	6280	3
15	5	symmetrical	3440	3
15	6	asymmetrical	8800	3
15	7	symmetrical	1040	3
15	8	asymmetrical	1280	3
15	9	asymmetrical	2000	3
15	10	symmetrical	1600	3
15	11	symmetrical	2280	3
15	12	asymmetrical	2440	3
15	13	asymmetrical	1960	3
15	14	symmetrical	1240	3
15	15	symmetrical	1200	3
15	16	asymmetrical	4960	3
16	1	asymmetrical	17480	3
16	2	asymmetrical	3080	3
16	3	symmetrical	2720	3
16	4	asymmetrical	1320	3
16	5	symmetrical	1480	3
16	6	symmetrical	2280	3
16	7	asymmetrical	2160	3
16	8	symmetrical	1640	3
16	9	symmetrical	2400	3
16	10	asymmetrical	3200	3
16	11	asymmetrical	2640	3
16	12	symmetrical	2400	3
16	13	asymmetrical	2440	3
16	14	symmetrical	1040	3
16	15	symmetrical	1000	3
16	16	asymmetrical	1280	3
17	1	symmetrical	3240	3
17	2	asymmetrical	7280	3
17	3	asymmetrical	3200	3
17	4	symmetrical	17480	3
17	5	asymmetrical	17200	3
17	6	asymmetrical	6200	3
17	7	symmetrical	2960	3
17	8	symmetrical	2600	3
17	9	asymmetrical	19240	3
17	10	symmetrical	1680	3
17	11	asymmetrical	2920	3
17	12	asymmetrical	28440	3
17	13	symmetrical	2920	3
17	14	symmetrical	10320	3
17	15	asymmetrical	2000	3
17	16	symmetrical	9600	3
18	1	asymmetrical	19800	3
18	2	symmetrical	13680	3
18	3	symmetrical	20320	3
18	4	asymmetrical	7080	3
18	5	symmetrical	6320	3
18	6	symmetrical	7000	3
18	7	asymmetrical	7200	3
18	8	asymmetrical	3400	3
18	9	symmetrical	9438	3
18	10	asymmetrical	14760	3
18	11	symmetrical	11680	3
18	12	asymmetrical	6600	3
18	13	symmetrical	11280	3
18	14	symmetrical	2200	3
18	15	asymmetrical	1640	3
18	16	asymmetrical	17520	3
19	1	asymmetrical	29200	3
19	2	asymmetrical	8760	3
19	3	symmetrical	5440	3
19	4	asymmetrical	19720	3
19	5	symmetrical	6680	3
19	6	asymmetrical	17680	3
19	7	symmetrical	27520	3
19	8	symmetrical	23480	3
19	9	asymmetrical	18280	3
19	10	symmetrical	5640	3
19	11	asymmetrical	6520	3
19	12	symmetrical	4840	3
19	13	asymmetrical	7240	3
19	14	asymmetrical	3320	3
19	15	symmetrical	1880	3
19	16	symmetrical	3240	3
20	1	symmetrical	4720	3
20	2	asymmetrical	2080	3
20	3	asymmetrical	6240	3
20	4	symmetrical	4840	3
20	5	asymmetrical	9720	3
20	6	symmetrical	6000	3
20	7	asymmetrical	1240	3
20	8	symmetrical	2280	3
20	9	asymmetrical	1800	3
20	10	asymmetrical	5440	3
20	11	symmetrical	2160	3
20	12	symmetrical	1238	3
20	13	asymmetrical	800	3	<1000 ms
20	14	asymmetrical	1840	3
20	15	symmetrical	1560	3
20	16	symmetrical	5360	3
21	1	asymmetrical	16720	3
21	2	symmetrical	4680	3
21	3	symmetrical	3600	3
21	4	asymmetrical	6240	3
21	5	asymmetrical	3600	3
21	6	symmetrical	3240	3
21	7	asymmetrical	4760	3
21	8	symmetrical	7960	3
21	9	symmetrical	3840	3
21	10	asymmetrical	3920	3
21	11	symmetrical	2360	3
21	12	asymmetrical	5200	3
21	13	symmetrical	2720	3
21	14	asymmetrical	7120	3
21	15	asymmetrical	4560	3
21	16	symmetrical	6520	3
22	1	symmetrical	6640	3
22	2	asymmetrical	6520	3
22	3	asymmetrical	5840	3
22	4	symmetrical	4520	3
22	5	symmetrical	5480	3
22	6	asymmetrical	6040	3
22	7	symmetrical	5760	3
22	8	asymmetrical	2160	3
22	9	symmetrical	7640	3
22	10	symmetrical	12080	3
22	11	asymmetrical	4840	3
22	12	symmetrical	2720	3
22	13	asymmetrical	2120	3
22	14	symmetrical	9600	3
22	15	asymmetrical	2720	3
22	16	asymmetrical	1400	3
23	1	asymmetrical	26560	3
23	2	symmetrical	26440	3
23	3	symmetrical	11480	3
23	4	asymmetrical	1040	3
23	5	symmetrical	1280	3
23	6	asymmetrical	4200	3
23	7	symmetrical	4480	3
23	8	asymmetrical	15080	3
23	9	asymmetrical	26278	3
23	10	symmetrical	11520	3
23	11	symmetrical	25680	3
23	12	asymmetrical	4760	3
23	13	symmetrical	4720	3
23	14	asymmetrical	4958	3
23	15	asymmetrical	6720	3
23	16	symmetrical	2760	3
24	1	asymmetrical	23438	3
24	2	asymmetrical	20518	3
24	3	symmetrical	22720	3
24	4	symmetrical	4560	3
24	5	asymmetrical	3040	3
24	6	symmetrical	7200	3
24	7	asymmetrical	2720	3
24	8	symmetrical	3600	3
24	9	asymmetrical	2600	3
24	10	asymmetrical	2160	3
24	11	symmetrical	2280	3
24	12	asymmetrical	2320	3
24	13	symmetrical	1800	3
24	14	asymmetrical	3840	3
24	15	symmetrical	2840	3
24	16	symmetrical	1320	3

## Sheet: Group4 Category-ABABA
Participant	Test trial	Stimulus type	Total looking time (msec)	Number of unique tiles	Trials excluded from analysis	*Position of repetition		Number of trials run	Number of trials excluded from analysis	% of trials excluded from analysis
1	1	symmetrical	5040	5				397	16	4.03023
1	2	symmetrical	3600	5
1	3	asymmetrical	8960	5		at edge
1	4	asymmetrical	7600	5		not at edge
1	5	symmetrical	5400	5				*In the asymmetrical trials entered into analysis,
1	6	asymmetrical	6000	5		not at edge		whether repeated tiles appeared at the mosaics' edge
1	7	symmetrical	7400	5
1	8	asymmetrical	4240	5		at edge
1	9	asymmetrical	2640	5		at edge
1	10	symmetrical	2720	5
1	11	asymmetrical	2600	5		not at edge
1	12	asymmetrical	7880	5		at edge
1	13	symmetrical	1680	5
1	14	symmetrical	2320	5
1	15	asymmetrical	2120	5		not at edge
1	16	symmetrical	1720	5
2	1	symmetrical	24320	5
2	2	asymmetrical	16040	5		not at edge
2	3	symmetrical	11400	5
2	4	asymmetrical	26120	5		not at edge
2	5	asymmetrical	29960	5		at edge
2	6	symmetrical	28920	5
2	7	asymmetrical	10960	5		at edge
2	8	symmetrical	5200	5
2	9	asymmetrical	25560	5		at edge
2	10	symmetrical	12720	5
2	11	symmetrical	6360	5
2	12	asymmetrical	3680	5		not at edge
2	13	symmetrical	3720	5
2	14	asymmetrical		5	parent stops study after trial 13
2	15	asymmetrical		5	parent stops study after trial 13
2	16	symmetrical		5	parent stops study after trial 13
3	1	asymmetrical	15360	5		at edge
3	2	asymmetrical	9000	5		at edge
3	3	symmetrical	5640	5
3	4	symmetrical	1600	5
3	5	asymmetrical	7400	5		not at edge
3	6	asymmetrical	6000	5		at edge
3	7	symmetrical	1920	5
3	8	symmetrical	1320	5
3	9	asymmetrical	1680	5		not at edge
3	10	symmetrical	1800	5
3	11	asymmetrical	1240	5		at edge
3	12	symmetrical	1720	5
3	13	asymmetrical	1200	5		not at edge
3	14	asymmetrical	1720	5		not at edge
3	15	symmetrical	1680	5
3	16	symmetrical	1280	5
4	1	symmetrical	2680	5
4	2	asymmetrical	4360	5		not at edge
4	3	symmetrical	3280	5
4	4	symmetrical	5200	5
4	5	asymmetrical	3280	5		not at edge
4	6	symmetrical	1480	5
4	7	asymmetrical	2800	5		at edge
4	8	asymmetrical	1760	5		at edge
4	9	symmetrical	2960	5
4	10	asymmetrical	1240	5		at edge
4	11	asymmetrical	2920	5		not at edge
4	12	symmetrical	1560	5
4	13	asymmetrical	1120	5		not at edge
4	14	symmetrical	1320	5
4	15	symmetrical	1280	5
4	16	asymmetrical	1560	5		at edge
5	1	asymmetrical	4760	5		not at edge
5	2	symmetrical	3200	5
5	3	symmetrical	800	5	<1000 ms
5	4	asymmetrical	1120	5		at edge
5	5	asymmetrical	1400	5		at edge
5	6	symmetrical	7040	5
5	7	symmetrical	800	5	<1000 ms
5	8	asymmetrical	5040	5		not at edge
5	9	asymmetrical	800	5	<1000 ms	at edge
5	10	symmetrical	2840	5
5	11	symmetrical	2000	5
5	12	asymmetrical	840	5	<1000 ms	not at edge
5	13	symmetrical	640	5	<1000 ms
5	14	symmetrical	6080	5
5	15	asymmetrical	7520	5		not at edge
5	16	asymmetrical	2520	5		at edge
6	1	symmetrical	4640	5
6	2	asymmetrical	1680	5		not at edge
6	3	symmetrical	7560	5
6	4	asymmetrical	14280	5		at edge
6	5	asymmetrical	15080	5		at edge
6	6	symmetrical	8160	5
6	7	symmetrical	8800	5
6	8	asymmetrical	12440	5		not at edge
6	9	symmetrical	13560	5
6	10	asymmetrical	1880	5		at edge
6	11	asymmetrical	1960	5		not at edge
6	12	symmetrical	3760	5
6	13	symmetrical	5000	5
6	14	asymmetrical	3840	5		not at edge
6	15	asymmetrical	1320	5		at edge
6	16	symmetrical	3320	5
7	1	asymmetrical	11480	5		at edge
7	2	asymmetrical	20960	5		not at edge
7	3	symmetrical	27480	5
7	4	asymmetrical	24800	5		at edge
7	5	symmetrical	26440	5
7	6	symmetrical	6160	5
7	7	asymmetrical	4320	5		at edge
7	8	symmetrical	4080	5
7	9	symmetrical	2640	5
7	10	asymmetrical	3360	5		not at edge
7	11	symmetrical	3000	5
7	12	asymmetrical	2160	5		not at edge
7	13	symmetrical	7120	5
7	14	asymmetrical	3360	5		not at edge
7	15	symmetrical	3520	5
7	16	asymmetrical	3640	5		at edge
8	1	symmetrical	28320	5
8	2	asymmetrical	28640	5		not at edge
8	3	asymmetrical	15320	5		at edge
8	4	symmetrical	18160	5
8	5	asymmetrical	20720	5		at edge
8	6	symmetrical	12400	5
8	7	asymmetrical	14040	5		at edge
8	8	symmetrical	17040	5
8	9	symmetrical	6040	5
8	10	asymmetrical	20800	5		not at edge
8	11	symmetrical	28200	5
8	12	asymmetrical	7320	5		at edge
8	13	symmetrical	4320	5
8	14	asymmetrical	5400	5		not at edge
8	15	asymmetrical	2720	5		not at edge
8	16	symmetrical	2040	5
9	1	asymmetrical	12600	5		not at edge
9	2	asymmetrical	16000	5		not at edge
9	3	symmetrical	7360	5
9	4	asymmetrical	4880	5		not at edge
9	5	symmetrical	5600	5
9	6	asymmetrical	9640	5		at edge
9	7	symmetrical	3360	5
9	8	symmetrical	4320	5
9	9	asymmetrical	5640	5		at edge
9	10	symmetrical	4440	5
9	11	asymmetrical	14400	5		not at edge
9	12	symmetrical	4920	5
9	13	asymmetrical	12320	5		at edge
9	14	symmetrical	3280	5
9	15	asymmetrical	1400	5		at edge
9	16	symmetrical	8040	5
10	1	symmetrical	5520	5
10	2	symmetrical	5520	5
10	3	asymmetrical	2400	5		not at edge
10	4	asymmetrical	5880	5		not at edge
10	5	symmetrical	6320	5
10	6	asymmetrical	4360	5		at edge
10	7	symmetrical	7520	5
10	8	asymmetrical	3080	5		at edge
10	9	asymmetrical	2640	5		not at edge
10	10	symmetrical	1840	5
10	11	symmetrical	3800	5
10	12	asymmetrical	1880	5		at edge
10	13	symmetrical	2120	5
10	14	symmetrical	1800	5
10	15	asymmetrical	3040	5		not at edge
10	16	asymmetrical	4240	5		at edge
11	1	asymmetrical	4880	5		not at edge
11	2	symmetrical	6960	5
11	3	symmetrical	18920	5
11	4	asymmetrical	11440	5		at edge
11	5	asymmetrical	12960	5		at edge
11	6	symmetrical	4480	5
11	7	asymmetrical	5440	5		not at edge
11	8	symmetrical	3560	5
11	9	symmetrical	3840	5
11	10	asymmetrical	12960	5		at edge
11	11	symmetrical	3680	5
11	12	asymmetrical	1560	5		at edge
11	13	asymmetrical	4440	5		not at edge
11	14	symmetrical	8920	5
11	15	asymmetrical	5000	5		not at edge
11	16	symmetrical	8520	5
12	1	symmetrical	18520	5
12	2	asymmetrical	18560	5		not at edge
12	3	asymmetrical	20560	5		at edge
12	4	symmetrical	25680	5
12	5	symmetrical	5920	5
12	6	asymmetrical	2400	5		at edge
12	7	symmetrical	3880	5
12	8	asymmetrical	10200	5		not at edge
12	9	asymmetrical	2720	5		not at edge
12	10	symmetrical	7200	5
12	11	symmetrical	2360	5
12	12	asymmetrical	17080	5		not at edge
12	13	asymmetrical	3800	5		at edge
12	14	symmetrical	2280	5
12	15	symmetrical	10720	5
12	16	asymmetrical	3040	5		at edge
13	1	symmetrical	3240	5
13	2	asymmetrical	3400	5		at edge
13	3	asymmetrical	13880	5		not at edge
13	4	symmetrical	3040	5
13	5	asymmetrical	3280	5		not at edge
13	6	asymmetrical	2200	5		not at edge
13	7	symmetrical	3160	5
13	8	symmetrical	2840	5
13	9	asymmetrical	3000	5		at edge
13	10	symmetrical	7240	5
13	11	asymmetrical	9480	5		not at edge
13	12	asymmetrical	6840	5		at edge
13	13	symmetrical	6840	5
13	14	symmetrical	6840	5
13	15	asymmetrical	6920	5		at edge
13	16	symmetrical	10000	5
14	1	asymmetrical	20560	5		at edge
14	2	symmetrical	10000	5
14	3	symmetrical	21200	5
14	4	asymmetrical	21358	5		at edge
14	5	symmetrical	10920	5
14	6	symmetrical	10760	5
14	7	asymmetrical	26400	5		not at edge
14	8	asymmetrical	10840	5		not at edge
14	9	symmetrical	3400	5
14	10	asymmetrical	11440	5		not at edge
14	11	symmetrical	10560	5
14	12	asymmetrical	12160	5		at edge
14	13	symmetrical	14960	5
14	14	symmetrical	2640	5
14	15	asymmetrical	7840	5		at edge
14	16	asymmetrical	2560	5		not at edge
15	1	symmetrical	25720	5
15	2	asymmetrical	26480	5		at edge
15	3	asymmetrical	29000	5		at edge
15	4	symmetrical	8600	5
15	5	asymmetrical	28280	5		not at edge
15	6	symmetrical	26520	5
15	7	asymmetrical	18280	5		not at edge
15	8	symmetrical	19640	5
15	9	asymmetrical	12280	5		not at edge
15	10	asymmetrical	10840	5		not at edge
15	11	symmetrical	28920	5
15	12	symmetrical	28720	5
15	13	asymmetrical	29360	5		at edge
15	14	asymmetrical	23840	5		at edge
15	15	symmetrical	27880	5
15	16	symmetrical	10680	5
16	1	asymmetrical	2440	5		not at edge
16	2	symmetrical	1240	5
16	3	symmetrical	2640	5
16	4	asymmetrical	1320	5		at edge
16	5	asymmetrical	3680	5		at edge
16	6	symmetrical	1600	5
16	7	symmetrical	40	5	<1000 ms
16	8	asymmetrical	1040	5		at edge
16	9	asymmetrical	3600	5		not at edge
16	10	symmetrical	600	5	<1000 ms
16	11	symmetrical	1400	5
16	12	asymmetrical	2000	5		not at edge
16	13	symmetrical	1560	5
16	14	asymmetrical	920	5	<1000 ms	not at edge
16	15	symmetrical	7040	5
16	16	asymmetrical	1280	5		at edge
17	1	asymmetrical	22920	5		at edge
17	2	symmetrical	25320	5
17	3	symmetrical	15240	5
17	4	asymmetrical	23360	5		not at edge
17	5	asymmetrical	27960	5		at edge
17	6	symmetrical	3000	5
17	7	asymmetrical	3600	5		at edge
17	8	symmetrical	2280	5
17	9	symmetrical	2920	5
17	10	asymmetrical	4600	5		not at edge
17	11	symmetrical	2840	5
17	12	asymmetrical	4600	5		at edge
17	13	symmetrical	2120	5
17	14	asymmetrical	2360	5		not at edge
17	15	asymmetrical	3920	5		not at edge
17	16	symmetrical	3040	5
18	1	symmetrical	2200	5
18	2	asymmetrical	9600	5		not at edge
18	3	symmetrical	1440	5
18	4	asymmetrical	4480	5		not at edge
18	5	symmetrical	8240	5
18	6	asymmetrical	1920	5		not at edge
18	7	asymmetrical	1960	5		at edge
18	8	symmetrical	5600	5
18	9	asymmetrical	1920	5		at edge
18	10	symmetrical	24280	5
18	11	symmetrical	1600	5
18	12	asymmetrical	1360	5		not at edge
18	13	symmetrical	2960	5
18	14	asymmetrical	1480	5		at edge
18	15	symmetrical	5400	5
18	16	asymmetrical	11120	5		at edge
19	1	symmetrical	25998	5
19	2	asymmetrical	6280	5		at edge
19	3	asymmetrical	5160	5		not at edge
19	4	symmetrical	2080	5
19	5	symmetrical	1360	5
19	6	asymmetrical	3600	5		not at edge
19	7	symmetrical	2760	5
19	8	asymmetrical	1200	5		at edge
19	9	symmetrical	15880	5
19	10	symmetrical	5280	5
19	11	asymmetrical	8920	5		at edge
19	12	symmetrical	6520	5
19	13	asymmetrical	2200	5		not at edge
19	14	symmetrical	400	5	<1000 ms
19	15	asymmetrical	4240	5		at edge
19	16	asymmetrical	3360	5		not at edge
20	1	symmetrical	6680	5
20	2	asymmetrical	5720	5		not at edge
20	3	asymmetrical	2520	5		at edge
20	4	symmetrical	4000	5
20	5	symmetrical	1480	5
20	6	asymmetrical	3840	5		at edge
20	7	asymmetrical	2360	5		at edge
20	8	symmetrical	3000	5
20	9	asymmetrical	1440	5		not at edge
20	10	symmetrical	6440	5
20	11	asymmetrical	2520	5		at edge
20	12	symmetrical	2120	5
20	13	asymmetrical	11120	5		not at edge
20	14	asymmetrical	2240	5		not at edge
20	15	symmetrical	1200	5
20	16	symmetrical	2520	5
21	1	asymmetrical	28080	5		not at edge
21	2	asymmetrical	21360	5		not at edge
21	3	symmetrical	29080	5
21	4	asymmetrical	29040	5		at edge
21	5	symmetrical	28878	5
21	6	asymmetrical	28600	5		at edge
21	7	symmetrical	3080	5
21	8	symmetrical	6040	5
21	9	asymmetrical	3120	5		at edge
21	10	asymmetrical	21720	5		not at edge
21	11	symmetrical	5920	5
21	12	symmetrical	2680	5
21	13	asymmetrical	6320	5		at edge
21	14	symmetrical	27400	5
21	15	asymmetrical	11760	5		not at edge
21	16	symmetrical	5960	5
22	1	symmetrical	18960	5
22	2	asymmetrical	14440	5		at edge
22	3	asymmetrical	14358	5		at edge
22	4	symmetrical	14998	5
22	5	asymmetrical	17720	5		not at edge
22	6	asymmetrical	7200	5		at edge
22	7	symmetrical	2080	5
22	8	symmetrical	2880	5
22	9	asymmetrical	3800	5		not at edge
22	10	symmetrical	5040	5
22	11	symmetrical	6240	5
22	12	asymmetrical	4720	5		not at edge
22	13	asymmetrical	5080	5		at edge
22	14	symmetrical	3960	5
22	15	symmetrical	4240	5
22	16	asymmetrical	2360	5		not at edge
23	1	asymmetrical	6358	5		not at edge
23	2	symmetrical	5718	5
23	3	symmetrical	2880	5
23	4	asymmetrical	5518	5		not at edge
23	5	symmetrical	23074	5
23	6	asymmetrical	22318	5		not at edge
23	7	symmetrical	4240	5
23	8	asymmetrical	15160	5		at edge
23	9	asymmetrical	3240	5		not at edge
23	10	symmetrical	2640	5
23	11	symmetrical	5160	5
23	12	asymmetrical	3680	5		at edge
23	13	symmetrical	5360	5
23	14	asymmetrical	7320	5		at edge
23	15	asymmetrical	3200	5		at edge
23	16	symmetrical	2200	5
24	1	symmetrical	16800	5
24	2	asymmetrical	6720	5		at edge
24	3	symmetrical	9640	5
24	4	asymmetrical	7320	5		at edge
24	5	asymmetrical	3360	5		not at edge
24	6	symmetrical	11000	5
24	7	symmetrical	2000	5
24	8	asymmetrical	1920	5		not at edge
24	9	symmetrical	10760	5
24	10	asymmetrical	2640	5		not at edge
24	11	symmetrical	5960	5
24	12	asymmetrical	12120	5		at edge
24	13	asymmetrical	1840	5		at edge
24	14	symmetrical	3200	5
24	15	symmetrical	3120	5
24	16	asymmetrical	9400	5		not at edge
25	1	symmetrical	2600	5
25	2	asymmetrical	3000	5		not at edge
25	3	asymmetrical	360	5	<1000 ms	not at edge
25	4	symmetrical	3920	5
25	5	symmetrical	1800	5
25	6	asymmetrical	720	5	<1000 ms	at edge
25	7	asymmetrical	4520	5		at edge
25	8	symmetrical	2760	5
25	9	asymmetrical	1800	5		not at edge
25	10	symmetrical	3640	5
25	11	asymmetrical	2480	5		not at edge
25	12	symmetrical	720	5	<1000 ms
25	13	symmetrical	4360	5
25	14	asymmetrical	1040	5		at edge
25	15	symmetrical	1800	5
25	16	asymmetrical	560	5	<1000 ms	at edge
